# Supplementary material
Source: Springer Nature journal article supplement (https://www.springermedizin.de/resource/supplementary/12906_2012_1342_MOESM1_ESM.pdf/9522524)

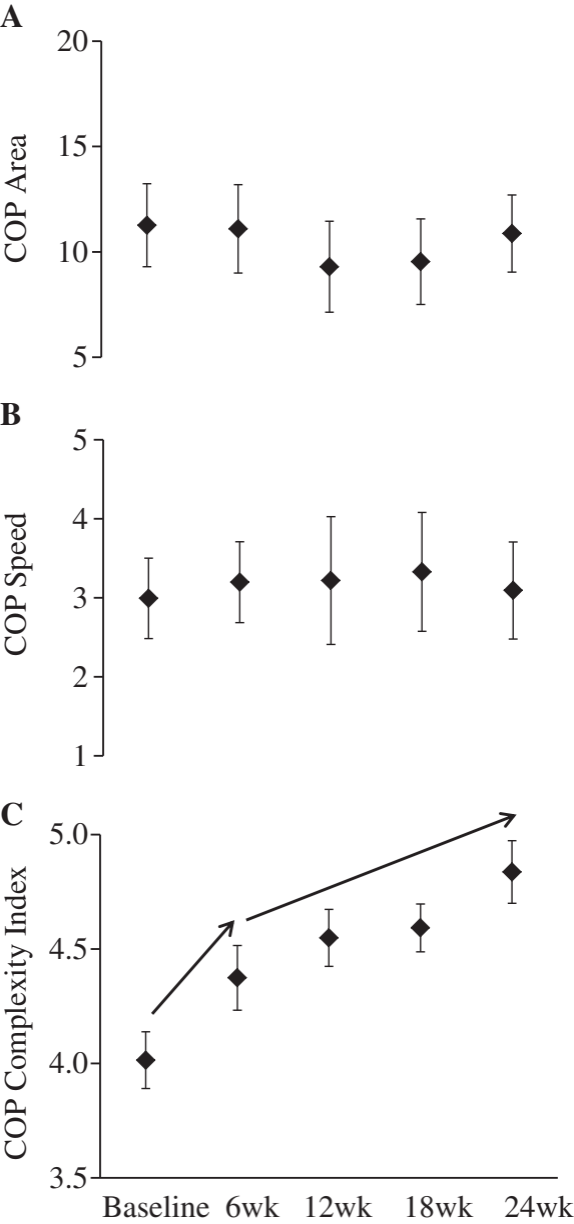

Supplement: MOESM1 [file 9522524]
